# Supplementary material for: A 3-miRNA signature predicts prognosis of pediatric and adolescent cytogenetically normal acute myeloid leukemia
Source: PubMed Central journal article supplement (PMC5503581; doi:10.18632/oncotarget.17151), 2017-04-17
Supplement: oncotarget-08-38902-s001.pdf [file oncotarget-08-38902-s001.pdf]

## **A 3-miRNA signature predicts prognosis of pediatric and adolescent cytogenetically normal acute myeloid leukemia**

### **Supplementary Materials**

**Supplementary Table 1: Target genes of three miRNAs.** See [Supplementary\\_Table\\_1](#)

**Supplementary Table 2: GO analysis conducted by DAVID.** See [Supplementary\\_Table\\_2](#)
